# Supplementary material for: Glucagon-like Peptide-1 Receptor in the Human Hypothalamus Is Associated with Body Mass Index and Colocalizes with the Anorexigenic Neuropeptide Nucleobindin-2/Nesfatin-1
Source: MDPI journal article supplement (doi:10.3390/ijms232314899), 2022-11-28
Supplement: s1 [file s1]

**Supplementary Table S2:** Distribution of GLP1R protein expression in the human hypothalamus of all examined cases, presented as immunostaining score, using rabbit polyclonal anti-GLP-1R antibody (Merck Millipore, Darmstadt, Germany, AB9433-I).

| Case | PVN | SON | IFN | LH  | PeF | VMH | DMH | TM | MPO | SCh | MN  | BN  | DB  | BST |
|------|-----|-----|-----|-----|-----|-----|-----|----|-----|-----|-----|-----|-----|-----|
| 1    | +++ | +++ | ++  | ++  | ++  | ++  | +   | ++ | +   | —   | ++  | +++ | ++  | ++  |
| 2    | +++ | +++ | ++  | +++ | +++ | ++  | ++  | +  | ++  | +   | —   | +++ | ++  | ++  |
| 3    | ++  | ++  | +   | ++  | +   | —   | —   | +  | ++  | +   | +++ | +++ | +++ | ++  |
| 4    | ++  | +++ | ++  | +++ | +++ | +   | ++  | +  | +++ | +   | ++  | ++  | ++  | ++  |
| 5    | ++  | ++  | +   | ++  | +   | —   | —   | +  | +   | +   | +   | ++  | n/a | —   |
| 6    | ++  | +++ | ++  | +++ | +++ | +   | ++  | ++ | ++  | —   | ++  | +++ | +++ | ++  |
| 7    | ++  | ++  | +   | +   | +   | +   | —   | +  | —   | +   | +   | ++  | ++  | n/a |
| 8    | ++  | +++ | +   | ++  | ++  | +   | +   | —  | —   | —   | +   | ++  | +++ | ++  |
| 9    | ++  | +++ | +++ | +++ | ++  | ++  | ++  | ++ | ++  | +   | —   | ++  | ++  | +   |
| 10   | ++  | +++ | +   | ++  | ++  | +   | +   | ++ | +   | n/a | ++  | ++  | ++  | ++  |
| 11   | ++  | ++  | +++ | +++ | ++  | +   | ++  | +  | ++  | ++  | ++  | ++  | +   | ++  |
| 12   | +++ | ++  | —   | ++  | ++  | ++  | ++  | ++ | n/a | —   | —   | +++ | +++ | +++ |
| 13   | ++  | ++  | ++  | +   | +   | n/a | —   | —  | +   | n/a | ++  | +   | +   | n/a |
| 14   | +++ | +++ | +++ | +++ | +   | +   | +   | +  | —   | +   | ++  | ++  | ++  | +++ |
| 15   | ++  | ++  | n/a | ++  | +   | n/a | —   | —  | +   | —   | +++ | +++ | ++  | n/a |
| 16   | ++  | +++ | ++  | ++  | ++  | ++  | +   | —  | ++  | —   | —   | ++  | ++  | +++ |
| 17   | +++ | +++ | +++ | +   | +   | +++ | ++  | +  | ++  | —   | ++  | ++  | n/a | n/a |
| 18   | +++ | +++ | +   | +   | +   | +   | +   | +  | +   | —   | +   | +++ | +++ | ++  |

|              |       |       |       |       |       |       |       |       |       |       |       |       |       |       |
|--------------|-------|-------|-------|-------|-------|-------|-------|-------|-------|-------|-------|-------|-------|-------|
| 19           | ++    | ++    | +     | ++    | ++    | –     | +     | ++    | –     | ++    | +++   | ++    | ++    | ++    |
| 20           | +     | ++    | ++    | +     | +     | +     | n/a   | n/a   | ++    | –     | ++    | ++    | ++    | +     |
| 21           | ++    | +++   | ++    | +     | +     | –     | –     | +     | +     | +     | +     | ++    | ++    | ++    |
| 22           | ++    | +++   | +     | +     | ++    | +     | +     | ++    | ++    | –     | ++    | ++    | ++    | ++    |
| 23           | +++   | +++   | ++    | ++    | +     | ++    | +     | ++    | ++    | +     | –     | ++    | +++   | ++    |
| 24           | ++    | ++    | +     | ++    | +     | ++    | –     | n/a   | –     | –     | +     | ++    | ++    | n/a   |
| 25           | ++    | ++    | ++    | ++    | +     | ++    | n/a   | +     | +     | +     | –     | ++    | +     | ++    |
| 26           | +     | +     | +++   | ++    | ++    | ++    | ++    | ++    | ++    | –     | +     | n/a   | ++    | +     |
| 27           | ++    | ++    | n/a   | +     | +     | –     | +     | ++    | +     | –     | +++   | +     | +     | n/a   |
| 28           | ++    | +++   | –     | +     | ++    | +     | +     | +     | +     | +     | +     | ++    | n/a   | +     |
| <b>Total</b> |       |       |       |       |       |       |       |       |       |       |       |       |       |       |
| +++          | 7/28  | 15/28 | 5/28  | 6/28  | 3/28  | 1/28  | 0/28  | 0/28  | 1/28  | 0/28  | 4/28  | 7/28  | 6/28  | 3/28  |
| ++           | 18/28 | 12/28 | 10/28 | 13/28 | 11/28 | 9/28  | 8/28  | 10/28 | 11/28 | 2/28  | 10/28 | 18/28 | 15/28 | 14/28 |
| +            | 3/28  | 1/28  | 9/28  | 9/28  | 14/28 | 11/28 | 11/28 | 12/28 | 10/28 | 11/28 | 8/28  | 2/28  | 4/28  | 4/28  |
| –            | 0/28  | 0/28  | 2/28  | 0/28  | 0/28  | 5/28  | 7/28  | 4/28  | 5/28  | 13/28 | 6/28  | 0/28  | 0/28  | 1/28  |

Abbreviations: BN, basal nucleus; BST, bed nucleus of the stria terminalis; DB, diagonal band; DMH, dorsomedial hypothalamic nucleus; IFN, infundibular nucleus; LH, lateral hypothalamic area; MN, mammillary nucleus; MPO, medial preoptic nucleus; PeF, perifornical nucleus; PVN, paraventricular nucleus; Sch, suprachiasmatic nucleus; SON, supraoptic nucleus; TM, tuberomammillary nucleus; VMH; ventromedial hypothalamic nucleus.

+++ , >50% of cells exhibit high immunoexpression; ++ , >50% of cells exhibit moderate immunoexpression; + , >50% of cells exhibit low immunoexpression; – , no staining; n/a; not assessed.
